# Supplementary material for: Shifts in organic matter character and microbial community structure from glacial headwaters to downstream reaches in Canadian Rocky Mountain rivers
Source: Copernicus journal article supplement (doi:10.5194/bg-2023-121), 2023-09-06
Supplement: Supplementary file 1 [file bg-2023-121-supplement.pdf]

**Table S1:** Site characteristics describing distance range, glacier source of headwaters, name of river, coordinates (in degrees, decimal minutes), approximate distance of sampling site from glacier terminus (estimated from Google Earth), and the number of times each site was visited in this study.

| <b>Distance Range</b> | <b>Glacier headwaters</b> | <b>River</b> | <b>Latitude</b> | <b>Longitude</b> | <b>Distance from glacier terminus (km)</b> | <b>Number of times visited</b> |
|-----------------------|---------------------------|--------------|-----------------|------------------|--------------------------------------------|--------------------------------|
| Headwater             | Athabasca                 | Sunwapta     | 52°12'25.8"     | -117°14'05.9"    | 0                                          | 16                             |
| Near                  | Athabasca                 | Sunwapta     | 52°12'59.5"     | -117°14'01.9"    | 3                                          | 15                             |
| Mid                   | Athabasca                 | Sunwapta     | 52°18'38.1"     | -117°19'57.3"    | 25                                         | 17                             |
| Far                   | Athabasca                 | Sunwapta     | 52°31'58.7"     | -117°38'39.2"    | 50                                         | 17                             |
| Far                   | Athabasca                 | Athabasca    | 52°34'59.6"     | -117°44'21.9"    | 50                                         | 14                             |
| Far                   | Athabasca                 | Athabasca    | 52°39'46.5"     | -117°52'51.7"    | 70                                         | 18                             |
| Far                   | Athabasca                 | Athabasca    | 52°48'43.4"     | -118°02'33.2"    | 100                                        | 16                             |
| Near                  | Saskatchewan              | NSR          | 52°10'10.1"     | -117°04'34.9"    | 7                                          | 18                             |
| Mid                   | Saskatchewan              | NSR          | 52°4'9.1"       | -116°54'54.9"    | 18                                         | 16                             |
| Mid                   | Saskatchewan              | NSR          | 51°58'14.0"     | -116°43'16.0"    | 35                                         | 16                             |
| Near                  | Bow                       | Bow          | 51°39'42.3"     | -116°29'12.98"   | 2                                          | 14                             |
| Mid                   | Bow                       | Bow          | 51°37'53.04"    | -116°20'6.6"     | 15                                         | 15                             |
| Mid                   | Bow                       | Bow          | 51°25'43.2"     | -116°11'20.4"    | 40                                         | 17                             |

**Table S2:** Description of characteristics for various the absorbance- and fluorescence-based metrics used in this study.

| <b>Measurement</b>   | <b>Calculation</b>                                                                                        | <b>Purpose</b>                                                                                                                                               |
|----------------------|-----------------------------------------------------------------------------------------------------------|--------------------------------------------------------------------------------------------------------------------------------------------------------------|
| SUVA <sub>254</sub>  | Normalization of UV absorbance at 254 nm to DOC                                                           | Increasing values indicate increasing aromaticity (Weishaar et al. 2003)                                                                                     |
| S <sub>275-295</sub> | Slope over the 275nm-295nm wavelength range                                                               | Decreasing values indicates increasing molecular weight (Helms et al. 2008)                                                                                  |
| BIX                  | The ratio of emission at 380nm by 430nm at excitation of 310nm                                            | Biological Index: Increasing values indicate recently produced organic carbon (Huguet et al. 2008)                                                           |
| HIX                  | Fluorescence intensity over 300-340nm divided by the combined fluorescence in the 300-345nm and 435-480nm | Humification Index; Increasing values indicate increasing humification (Ohno 2002)                                                                           |
| FI                   | The ratio of emission at 400nm to 500nm at an excitation of 370nm                                         | Fluorescence Index: Higher values indicate microbially derived fulvic acids, lower values indicate terrestrially derived fulvic acids (McKnight et al. 2001) |

**Table S3:** Outputs from a two-way ANOVA to show the effect of distance range and hydrological season on the relative percentage of deuterium excess in stream water. Interaction effects and Tukey’s HSD comparisons for main effects are also shown. Significant main effects and post-hoc comparisons are bolded.

| <b>Deuterium excess</b> |           |              |                |                    |                         |                   |
|-------------------------|-----------|--------------|----------------|--------------------|-------------------------|-------------------|
| <b>Factor</b>           | <b>Df</b> | <b>SumSq</b> | <b>F value</b> | <b>p</b>           | <b>Tukey Comparison</b> | <b>p</b>          |
| Distance Range          | 3         | 95.76        | 44.74          | <b>&lt; 0.0001</b> | Headwater=Near          | 0.15              |
|                         |           |              |                |                    | Headwater>Mid           | <b>&lt;0.0001</b> |
|                         |           |              |                |                    | Headwater>Far           | <b>&lt;0.0001</b> |
|                         |           |              |                |                    | Near>Mid                | <b>&lt;0.0001</b> |
|                         |           |              |                |                    | Near>Far                | <b>&lt;0.0001</b> |
|                         |           |              |                |                    | Mid>Far                 | <b>&lt;0.0001</b> |
| Season                  | 2         | 20.83        | 14.6           | <b>&lt; 0.0001</b> | PreMelt<Melt            | <b>&lt;0.0001</b> |
|                         |           |              |                |                    | PreMelt=PostMelt        | <b>0.003</b>      |
|                         |           |              |                |                    | Melt=PostMelt           | 0.55              |
| DistRange: Season       | 6         | 11.35        | 2.651          | <b>0.0173</b>      |                         |                   |
| Residuals               | 186       | 3217         |                |                    |                         |                   |

**Table S4:** Outputs from a two-way ANOVA to show the effect of distance range and hydrological season on the relative percentage of  $\delta^{18}\text{O-H}_2\text{O}$  in stream water. Interaction effects and Tukey's HSD comparisons for main effects are also shown. Significant main effects and post-hoc comparisons are bolded.

| $\delta^{18}\text{O-H}_2\text{O}$ |           |              |                |                    |                         |                   |
|-----------------------------------|-----------|--------------|----------------|--------------------|-------------------------|-------------------|
| <b>Factor</b>                     | <b>Df</b> | <b>SumSq</b> | <b>F value</b> | <b>p</b>           | <b>Tukey Comparison</b> | <b>p</b>          |
| Distance Range                    | 3         | 1.71         | 1.802          | 0.15               |                         |                   |
| Season                            | 2         | 326          | 9.424          | <b>&lt; 0.0001</b> | PreMelt<Melt            | <b>&lt;0.0001</b> |
|                                   |           |              |                |                    | PreMelt=PostMelt        | <b>&lt;0.0001</b> |
|                                   |           |              |                |                    | Melt=PostMelt           | <b>&lt;0.0001</b> |
| DistRange: Season                 | 6         | 146          | 1.403          | <b>0.02</b>        |                         |                   |
| Residuals                         | 186       | 3217         |                |                    |                         |                   |

**Table S5:** Outputs from a three-way ANOVA to show the effect of distance range, hydrological season, and year on the DOC concentration in stream water. Interaction effects and Tukey’s HSD comparisons for main effects are also shown. Significant main effects and post-hoc comparisons are bolded.

| <b>DOC</b>             |           |              |                |                   |                         |                   |
|------------------------|-----------|--------------|----------------|-------------------|-------------------------|-------------------|
| <b>Factor</b>          | <b>Df</b> | <b>SumSq</b> | <b>F value</b> | <b>p value</b>    | <b>Tukey Comparison</b> | <b>p</b>          |
| Distance Range         | 3         | 8.531        | 26.983         | <b>&lt;0.0001</b> | Headwater = Near        | 0.99              |
|                        |           |              |                |                   | Headwater = Mid         | 0.081             |
|                        |           |              |                |                   | Headwater < Far         | <b>&lt;0.0001</b> |
|                        |           |              |                |                   | Near < Mid              | <b>0.0034</b>     |
|                        |           |              |                |                   | Near < Far              | <b>&lt;0.0001</b> |
|                        |           |              |                |                   | Mid < Far               | <b>&lt;0.0001</b> |
| Hydrological Season    | 1         | 5.488        | 52.074         | <b>&lt;0.0001</b> | PreMelt > Melt          | <b>&lt;0.0001</b> |
| Year                   | 2         | 0.997        | 4.731          | 0.0102            | 2019>2020               | <b>0.033</b>      |
|                        |           |              |                |                   | 2019>2021               | <b>0.014</b>      |
|                        |           |              |                |                   | 2020=2021               | 0.93              |
| DistRange: Season      | 3         | 1.365        | 4.318          | 0.006             |                         |                   |
| DistRange: Year        | 6         | 1.431        | 2.263          | 0.041             |                         |                   |
| Season: Year           | 1         | 3.480        | 33.025         | <b>&lt;0.0001</b> |                         |                   |
| DistRange: Season:Year | 3         | 1.344        | 4.25113        | 0.007             |                         |                   |
| Residuals              | 152       | 15.492       | NA             | NA                |                         |                   |

**Table S6:** Outputs from a three-way ANOVA to show the effect of distance range, hydrological season, and year on the POC concentration in stream water. Interaction effects and Tukey’s HSD comparisons for main effects are also shown. Significant main effects and post-hoc comparisons are bolded.

| <b>POC</b>                |           |              |                |                |                         |              |
|---------------------------|-----------|--------------|----------------|----------------|-------------------------|--------------|
| <b>Factor</b>             | <b>Df</b> | <b>SumSq</b> | <b>F value</b> | <b>P value</b> | <b>Tukey Comparison</b> | <b>p</b>     |
| Distance Range            | 3         | 1.746        | 3.281          | <b>0.023</b>   | Headwater > Near        | <b>0.019</b> |
|                           |           |              |                |                | Headwater = Mid         | 0.31         |
|                           |           |              |                |                | Headwater = Far         | 0.077        |
|                           |           |              |                |                | Near = Mid              | 0.23         |
|                           |           |              |                |                | Near = Far              | 0.69         |
|                           |           |              |                |                | Mid = Far               | 0.72         |
| Hydrological Season       | 1         | 0.240        | 1.352          | 0.246          |                         |              |
| Year                      | 2         | 1.110        | 3.129          | <b>0.046</b>   | 2019=2020               | 0.67         |
|                           |           |              |                |                | 2019>2021               | <b>0.05</b>  |
|                           |           |              |                |                | 2020=2021               | 0.21         |
| DistRange: Season         | 3         | 0.390        | 0.463          | 0.71           |                         |              |
| DistRange: Year           | 6         | 1.649        | 1.550          | 0.166          |                         |              |
| Season: Year              | 1         | 0.01         | 0.056          | 0.813          |                         |              |
| DistRange:<br>Season:Year | 3         | 0.0431       | 0.081          | 0.970          |                         |              |
| Residuals                 | 149       | 26.425       | NA             | NA             |                         |              |

**Table S7:** Excitation and emission maxima associated with PARAFAC components and associated DOM character as assessed by cross reference with the Open Fluor database.

| <b>Component</b> | <b>Emission peak</b> | <b>Excitation peak</b> | <b>Character</b>                                                                       | <b>Number of Open Fluor Matches</b> |
|------------------|----------------------|------------------------|----------------------------------------------------------------------------------------|-------------------------------------|
| C1               | 271                  | 230                    | Terrestrial / humic (Shutova et al., 2014)                                             | 118                                 |
| C2               | 409                  | 230                    | Terrestrial / humic (Catalán et al., 2018; Coulson et al., 2022; Shutova et al., 2014) | 105                                 |
| C3               | 340                  | 230                    | Microbial/tryptophan like (Murphy et al., 2008; Stedmon & Markager, 2005)              | 27                                  |
| C4               | 300                  | 230, 270-275           | Microbial/tyrosine like (Graeber et al., 2012)                                         | 14                                  |

**Table S8:** Outputs from a three-way ANOVA to show the effect of distance range, hydrological season, and year on the POC concentration in stream water. Interaction effects and Tukey’s HSD comparisons for main effects are also shown. Significant main effects and post-hoc comparisons are bolded.

| <b>Protein-like components</b> |           |              |                |                   |                         |                   |
|--------------------------------|-----------|--------------|----------------|-------------------|-------------------------|-------------------|
| <b>Factor</b>                  | <b>Df</b> | <b>SumSq</b> | <b>F value</b> | <b>P value</b>    | <b>Tukey Comparison</b> | <b>p</b>          |
| Distance Range                 | 3         | 3.215        | 29.183         | <b>&lt;0.0001</b> | Headwater > Near        | 0.21              |
|                                |           |              |                |                   | Headwater > Mid         | <b>&lt;0.0001</b> |
|                                |           |              |                |                   | Headwater > Far         | <b>&lt;0.0001</b> |
|                                |           |              |                |                   | Near > Mid              | <b>&lt;0.0001</b> |
|                                |           |              |                |                   | Near > Far              | <b>&lt;0.0001</b> |
|                                |           |              |                |                   | Mid > Far               | <b>0.025</b>      |
| Season                         | 1         | 0.357        | 9.729          | <b>0.00216</b>    | PreMelt - Melt          | <b>0.002</b>      |
| Year                           | 2         | 0.236        | 3.216          | <b>0.043</b>      | 2019=2020               | 0.12              |
|                                |           |              |                |                   | 2019=2021               | 0.071             |
|                                |           |              |                |                   | 2020=2021               | 0.95              |
| DistRange: Season              | 3         | 0.057        | 0.518          | 0.67              |                         |                   |
| DistRange: Year                | 6         | 0.423        | 1.922          | <b>0.08</b>       |                         |                   |
| Season: Year                   | 1         | 0.001        | 0.016          | 0.9               |                         |                   |
| DistRange: Season:Year         | 3         | 0.077        | 0.701          | 0.55              |                         |                   |
| Residuals                      | 158       | 5.802        |                |                   |                         |                   |



**Table S9:** Outputs from a three-way ANOVA to show the effect of distance range, hydrological season, and year on  $\delta^{13}\text{C}$ -DOC ‰ in stream water. Interaction effects and Tukey’s HSD comparisons for main effects are also shown. Significant main effects and post-hoc comparisons are bolded.

| $\delta^{13}\text{C}$ -DOC |     |       |         |                   |                    |                   |
|----------------------------|-----|-------|---------|-------------------|--------------------|-------------------|
| Factor                     | Df  | SumSq | F value | p                 | Tukey comparison p |                   |
| Distance Range             | 3   | 11.2  | 1.014   | 0.39              |                    |                   |
| Season                     | 2   | 45    | 6.088   | <b>0.003</b>      | PreMelt=Melt       | 0.12              |
|                            |     |       |         |                   | PreMelt<PostMelt   | <b>0.003</b>      |
|                            |     |       |         |                   | Melt<PostMelt      | <b>0.03</b>       |
| Year                       | 2   | 225   | 30.455  | <b>&lt;0.0001</b> | 2019>2020          | <b>&lt;0.0001</b> |
|                            |     |       |         |                   | 2019>2021          | <b>&lt;0.0001</b> |
|                            |     |       |         |                   | 2020=2021          | 0.45              |
| DistRange: Season          | 6   | 86.8  | 3.916   | <b>0.0014</b>     |                    |                   |
| DistRange: Year            | 6   | 115.2 | 5.197   | <b>&lt;0.0001</b> |                    |                   |
| Season: Year               | 2   | 46.1  | 6.245   | <b>0.0027</b>     |                    |                   |
| DistRange: Season:Year     | 3   | 5.1   | 0.459   | 0.71              |                    |                   |
| Residuals                  | 115 | 424.9 |         |                   |                    |                   |

**Table S10:** Outputs from a three-way ANOVA to show the effect of distance range, hydrological season, and year on  $\delta^{13}\text{C}$ -POC ‰ in stream water. Interaction effects and Tukey's HSD comparisons for main effects are also shown. Significant main effects and post-hoc comparisons are bolded.

| $\delta^{13}\text{C}$ -POC |     |       |         |                   |                    |                  |
|----------------------------|-----|-------|---------|-------------------|--------------------|------------------|
| Factor                     | Df  | SumSq | F value | p                 | Tukey Comparison p |                  |
| Distance Range             | 3   | 14.5  | 1.743   | 0.16              |                    |                  |
| Season                     | 2   | 69.8  | 12.604  | <b>&lt;0.0001</b> | PreMelt<Melt       | <b>&lt;0.001</b> |
|                            |     |       |         |                   | PreMelt<PostMelt   | <b>0.002</b>     |
|                            |     |       |         |                   | Melt=PostMelt      | 0.93             |
| Year                       | 2   | 489.4 | 88.35   | <b>&lt;0.001</b>  | 2019<2020          | <b>&lt;0.001</b> |
|                            |     |       |         |                   | 2019<2021          | <b>&lt;0.001</b> |
|                            |     |       |         |                   | 2020=2021          | 0.19             |
| DistRange: Season          | 6   | 35.2  | 2.118   | <b>0.05</b>       |                    |                  |
| DistRange: Year            | 6   | 52.2  | 3.139   | <b>0.006</b>      |                    |                  |
| Season: Year               | 3   | 6.1   | 0.732   | 0.53              |                    |                  |
| DistRange: Season:Year     | 7   | 37.2  | 1.92    | <b>0.07</b>       | .                  |                  |
| Residuals                  | 146 | 404.4 |         |                   |                    |                  |

**Table S11:** Outputs from a two-way ANOVA to show the effect of distance range and hydrological season on  $\Delta^{14}\text{C-DOC}$  ‰ in stream water. Interaction effects and Tukey’s HSD comparisons for main effects are also shown. Significant main effects and post-hoc comparisons are bolded.

| $\Delta^{14}\text{C-DOC}$ |           |              |                |              |                         |               |
|---------------------------|-----------|--------------|----------------|--------------|-------------------------|---------------|
| <b>Factor</b>             | <b>Df</b> | <b>SumSq</b> | <b>F value</b> | <b>p</b>     | <b>Tukey comparison</b> | <b>p</b>      |
| Distance Range            | 3         | 142056       | 2.37           | 0.085        |                         |               |
| Season                    | 2         | 269461       | 6.743          | <b>0.003</b> | PreMelt = melt          | 0.47          |
|                           |           |              |                |              | PreMelt > postmelt      | <b>0.0044</b> |
|                           |           |              |                |              | melt > PostMelt         | <b>0.011</b>  |
| DistRange: Season 3       |           | 5032         | 0.084          | 0.97         |                         |               |
| Residuals                 | 40        | 799220       |                |              |                         |               |

**Table S12:** perMANOVA test outputs showing the variation between proportion of microbial communities by distance range, hydrological season, year, and river. perMANOVA pairwise comparisons with holm adjusted p values are shown. Significant interactions are bolded.

| <b>Factor</b>  | <b>R<sup>2</sup></b> | <b>significance</b> | <b>PERMANOVA pairwise comparison</b> | <b>p (holm adjusted)</b> |
|----------------|----------------------|---------------------|--------------------------------------|--------------------------|
| Distance Range | 0.09                 | < 0.001             | Headwater - Near                     | 0.1659                   |
|                |                      |                     | Headwater - Far                      | <b>0.0044</b>            |
|                |                      |                     | Near - Far                           | <b>0.0003</b>            |
| Year           | 0.08                 | <0.001              | 2019-2020                            | <b>0.0003</b>            |
|                |                      |                     | 2019-2021                            | <b>0.0024</b>            |
|                |                      |                     | 2020-2021                            | <b>0.0068</b>            |
| Season         | 0.06                 | 0.002               | PreMelt – Melt                       | <b>0.0039</b>            |
|                |                      |                     | PreMelt – PostMelt                   | 0.0602                   |
|                |                      |                     | Melt – PostMelt                      | 0.2125                   |
| River          | 0.08                 | <0.001              | Sunwapta-Athabasca                   | <b>0.0027</b>            |
|                |                      |                     | Sunwapta-NSR                         | <b>0.0003</b>            |
|                |                      |                     | Athabasca-NSR                        | <b>0.0003</b>            |

**Table S13:** Potential OC sources to glacially-influenced streams, and their associated expected fluorescence signature and  $\delta^{13}\text{C-OC}$  and  $\Delta^{14}\text{C-OC}$  ranges.

| Source                          | $\delta^{13}\text{C-OC}$                                                                                                                                      | $\Delta^{14}\text{C-OC}$                                                                                                                                | Expected DOM fluorescence                                                                                                                                                   |
|---------------------------------|---------------------------------------------------------------------------------------------------------------------------------------------------------------|---------------------------------------------------------------------------------------------------------------------------------------------------------|-----------------------------------------------------------------------------------------------------------------------------------------------------------------------------|
| Vegetation                      | -26 to -28‰ (Peterson and Fry, 1987)                                                                                                                          | Downstream (contemporary) vegetation will be modern whereas subglacial over-ridden vegetation likely represents an aged OC source (Bhatia et al., 2013) | Humic-like (Gabor et al., 2014)                                                                                                                                             |
| Soils and associated pore water | -26 to -28‰ (Peterson and Fry, 1987)                                                                                                                          | Modern at the surface with increasing age with depth (Shi et al., 2020)                                                                                 | Humic-like with decreasing humification and increasing protein-like fluorescence with depth and increased soil residence time (Gabor et al., 2014) (McDonough et al., 2022) |
| Phytoplankton                   | -22 to -30‰ (Chanton & Lewis, 1999)                                                                                                                           | Ranging from modern to slightly aged depending on $\text{CO}_2$ source                                                                                  | Protein-like (Fellman et al., 2010)                                                                                                                                         |
| Benthic algae                   | Greater than -7 to -15‰ due to decreased isotopic fractionation, following carbon limitation associated with benthic boundary layers (Hecky & Hesslein, 1995) | Ranging from modern to slightly aged depending on $\text{CO}_2$ source                                                                                  | Protein-like (Fellman et al., 2010)                                                                                                                                         |
| Fossil fuel deposits            | -27‰ (Peterson & Fry, 1987)                                                                                                                                   | Ancient (radiocarbon dead)                                                                                                                              | Variable (Mladenov et al., 2010)                                                                                                                                            |
| Wildfire derived soot           | -26 to -28‰ (Peterson & Fry, 1987)                                                                                                                            | Modern (Masiello & Druffel, 2003)                                                                                                                       | Variable (Mladenov et al., 2010)                                                                                                                                            |
| Chemosynthesis                  | Very depleted -30 to -80‰, via sulfur oxidizing and methanogenic microbes (Blaser & Conrad, 2016; Rau & Hedges, 1979; Ruby et al., 1987)                      | Ranging from modern to slightly aged depending on the $\text{CO}_2$ source. Notably, subglacial $\text{CO}_2$ can represent an aged C source            | Protein-like (Fellman et al., 2010)                                                                                                                                         |

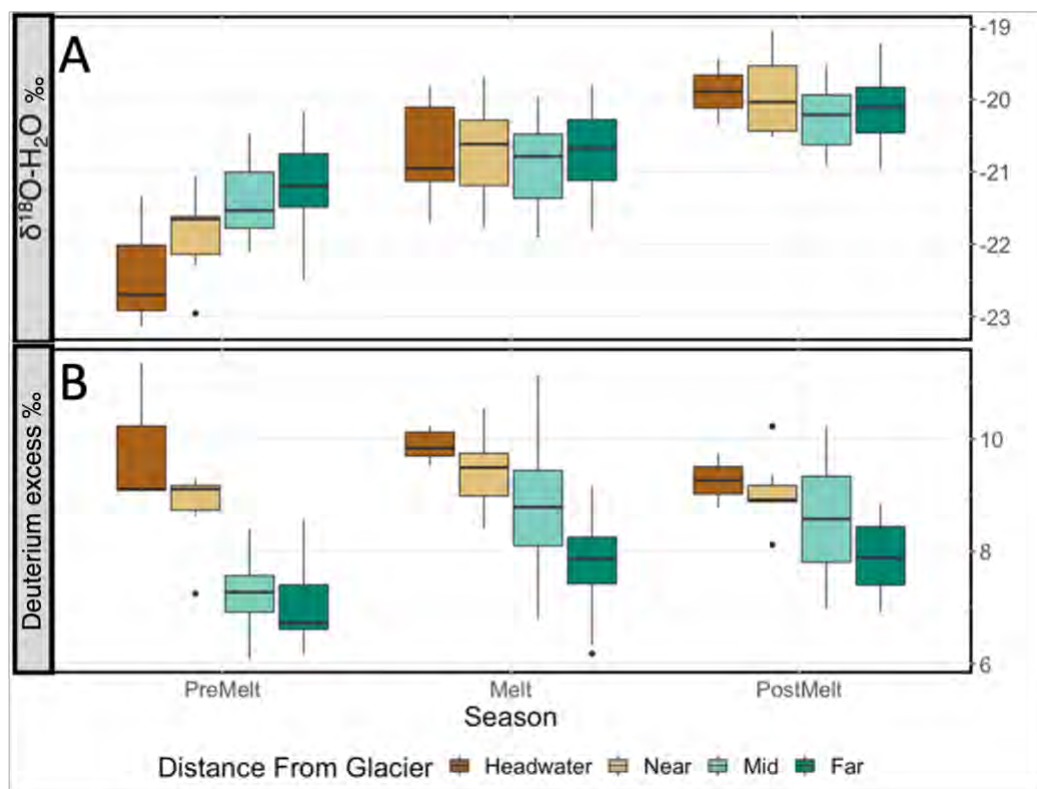

**Figure S1:** Boxplots of (a)  $\delta^{18}\text{O-H}_2\text{O}$ , and (b) deuterium excess within streams across pre-melt, melt and post-melt hydrological periods grouped by distance range downstream from glacial terminus. The boxes represent the interquartile range, the black line represents the median value, and the points represent outliers.

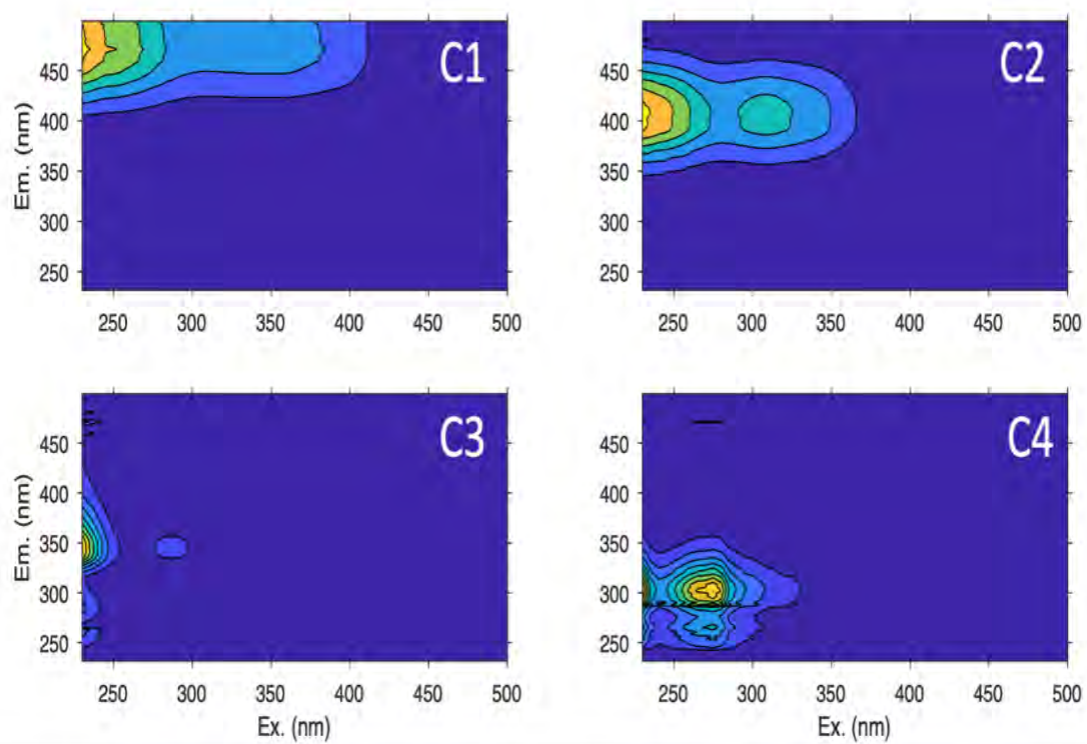

**Figure S2:** Component plots for the four-component PARAFAC model

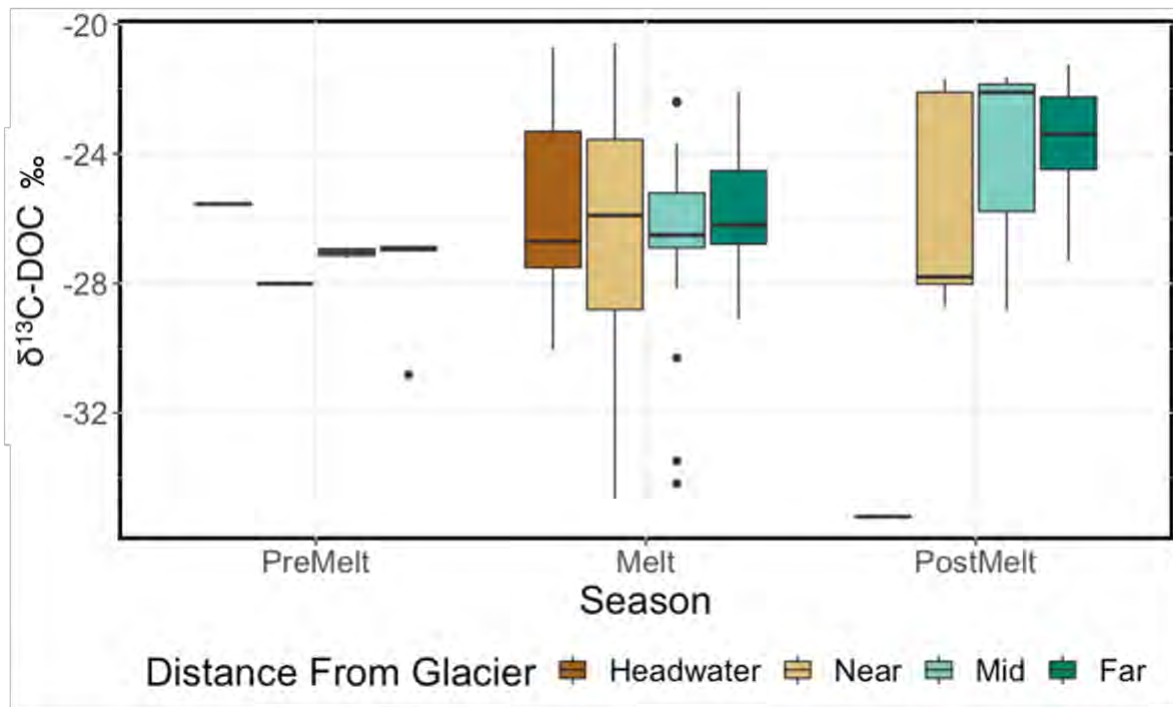

**Figure S3:** Boxplot of stream  $\delta^{13}\text{C-DOC}$  values for pre-melt, melt and post-melt hydrological periods grouped by distance range. The boxes represent the interquartile range, the black line represents the median value, and the points represent outliers.



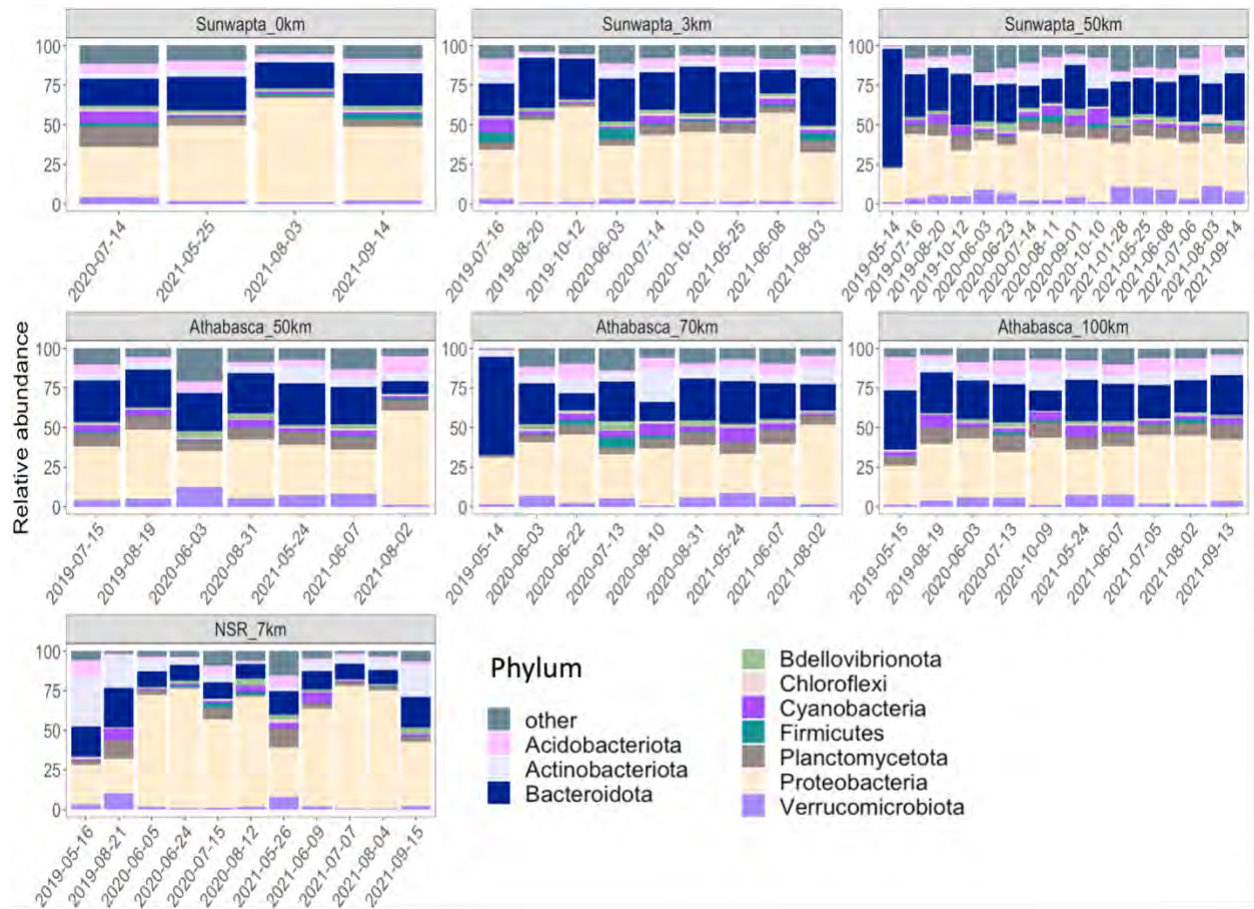

**Figure S4:** Relative abundance of the top ten most abundant taxonomic phyla across all sampling dates at the near and far sites in the Sunwapta-Athabasca and North Saskatchewan rivers. The category “Other” represents classes not included in the top ten.

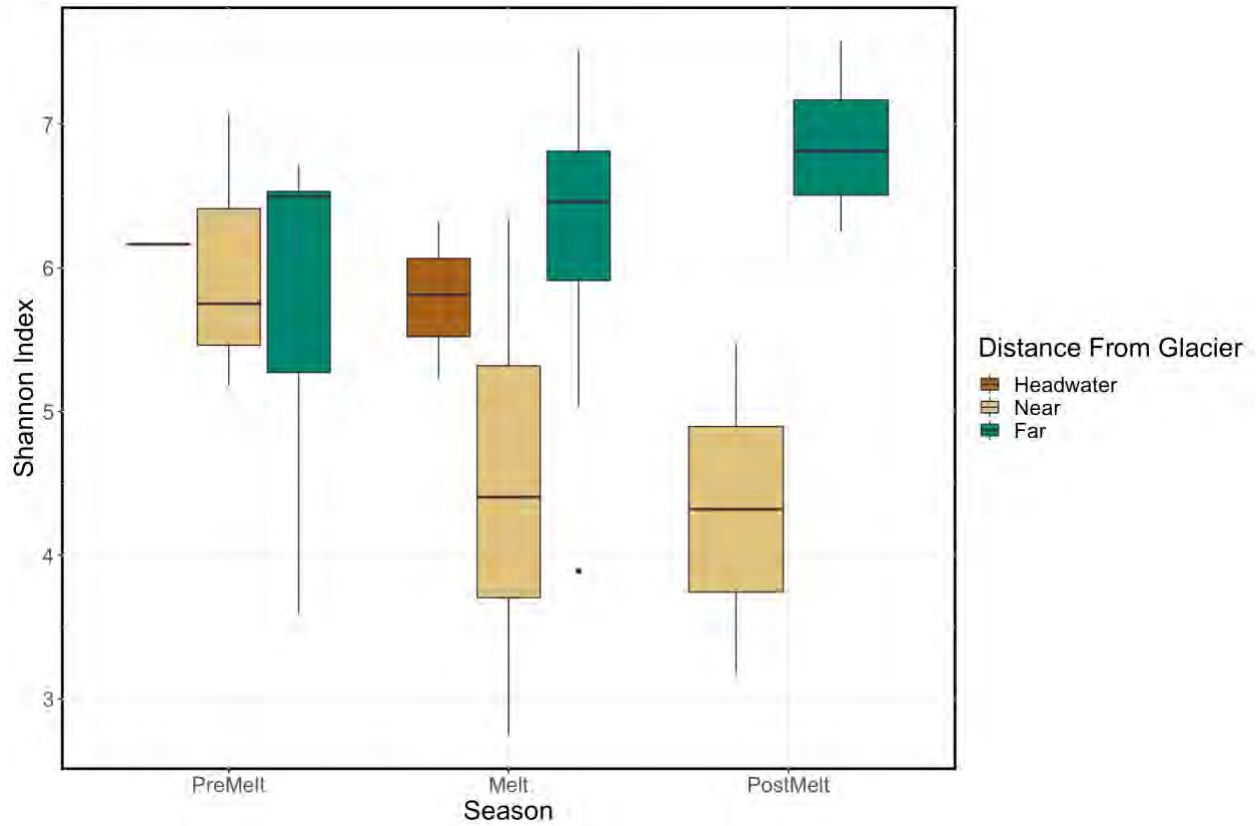

**Figure S5:** Boxplots showing variation in alpha diversity across hydrological periods and distance range, using the Shannon diversity index. The boxes represent the interquartile range, the black line represents the median value, and the points represent outliers.

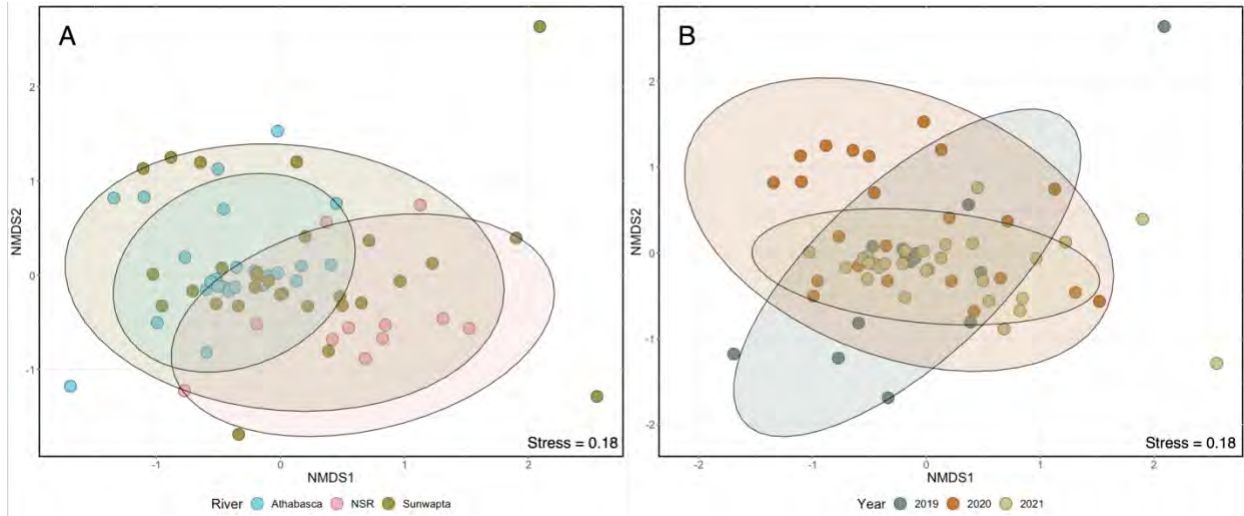

**Figure S6:** NMDS of microbial community composition based on Bray Curtis distances of Hellinger transformed ASV data. Colour represents different (a) study rivers and (b) sampling years. Shaded circles represent the 95% confidence interval for significantly different groupings (pairwise perMANOVA  $p < 0.01$  (holms adjusted) see Table S12).
